# Supplementary material for: Integrative Analysis of Angiogenesis-Related Long Non-Coding RNA and Identification of a Six-DEARlncRNA Signature Associated with Prognosis and Therapeutic Response in Esophageal Squamous Cell Carcinoma
Source: MDPI journal article supplement (doi:10.3390/cancers14174195), 2022-08-30
Supplement: s1 [file Table S2.xlsx]

## Sheet: Sheet1
ONTOLOGY	ID	Description	GeneRatio	BgRatio	pvalue	p.adjust	qvalue	geneID	Count
BP	GO:0031424	keratinization	8/68	225/18866	1.44e-06	0.00148647	0.00130921	ABCA12/KRT20/LCE3C/SPRR2G/RPTN/LCE2B/CDSN/LCE2A	8
BP	GO:0043588	skin development	10/68	425/18866	2.74e-06	0.00148647	0.00130921	DKK1/ABCA12/KRT20/LCE3C/SPRR2G/RPTN/ASPRV1/LCE2B/CDSN/LCE2A	10
BP	GO:0008544	epidermis development	10/68	477/18866	7.6e-06	0.00225864	0.00198931	KRTDAP/DKK1/ABCA12/KRT20/LCE3C/SPRR2G/RPTN/LCE2B/CDSN/LCE2A	10
BP	GO:1901661	quinone metabolic process	4/68	36/18866	8.33e-06	0.00225864	0.00198931	CYP4F3/AKR1B10/CYP4F2/AKR1C1	4
BP	GO:0030216	keratinocyte differentiation	8/68	306/18866	1.39e-05	0.00301053	0.00265154	ABCA12/KRT20/LCE3C/SPRR2G/RPTN/LCE2B/CDSN/LCE2A	8
BP	GO:0034308	primary alcohol metabolic process	5/68	94/18866	2.24e-05	0.00379328	0.00334095	AKR1B15/AKR1B10/RDH12/DHRS9/AKR1C1	5
BP	GO:0042572	retinol metabolic process	4/68	47/18866	2.45e-05	0.00379328	0.00334095	AKR1B15/AKR1B10/RDH12/DHRS9	4
BP	GO:0001523	retinoid metabolic process	5/68	108/18866	4.38e-05	0.00588425	0.00518258	AKR1B15/AKR1B10/RDH12/DHRS9/AKR1C1	5
BP	GO:0009913	epidermal cell differentiation	8/68	365/18866	4.89e-05	0.00588425	0.00518258	ABCA12/KRT20/LCE3C/SPRR2G/RPTN/LCE2B/CDSN/LCE2A	8
BP	GO:0016101	diterpenoid metabolic process	5/68	114/18866	5.68e-05	0.00615357	0.00541978	AKR1B15/AKR1B10/RDH12/DHRS9/AKR1C1	5
BP	GO:0006721	terpenoid metabolic process	5/68	124/18866	8.47e-05	0.00834482	0.00734973	AKR1B15/AKR1B10/RDH12/DHRS9/AKR1C1	5
BP	GO:0034754	cellular hormone metabolic process	5/68	134/18866	0.00012213	0.0110324	0.00971686	AKR1B15/AKR1B10/RDH12/DHRS9/AKR1C1	5
BP	GO:0006720	isoprenoid metabolic process	5/68	144/18866	0.000171147	0.014271	0.0125693	AKR1B15/AKR1B10/RDH12/DHRS9/AKR1C1	5
BP	GO:0051443	positive regulation of ubiquitin-protein transferase activity	3/68	35/18866	0.000269884	0.0208967	0.0184049	MAGEC2/MAGEA2/MAGEA2B	3
BP	GO:0042180	cellular ketone metabolic process	6/68	260/18866	0.000346313	0.0250269	0.0220425	CYP4F3/AKR1B10/PLA2G3/CYP4F2/DHRS9/AKR1C1	6
BP	GO:0030647	aminoglycoside antibiotic metabolic process	2/68	10/18866	0.000565397	0.0360524	0.0317533	AKR1B10/AKR1C1	2
BP	GO:0110096	cellular response to aldehyde	2/68	10/18866	0.000565397	0.0360524	0.0317533	AKR1B10/RDH12	2
BP	GO:0042758	long-chain fatty acid catabolic process	2/68	11/18866	0.000689432	0.0389011	0.0342623	CYP4F3/CYP4F2	2
BP	GO:0070268	cornification	4/68	113/18866	0.000739764	0.0389011	0.0342623	KRT20/SPRR2G/RPTN/CDSN	4
BP	GO:0033234	negative regulation of protein sumoylation	2/68	12/18866	0.000825393	0.0389011	0.0342623	MAGEA2/MAGEA2B	2
BP	GO:0042182	ketone catabolic process	2/68	12/18866	0.000825393	0.0389011	0.0342623	CYP4F3/CYP4F2	2
BP	GO:0042363	fat-soluble vitamin catabolic process	2/68	12/18866	0.000825393	0.0389011	0.0342623	CYP4F3/CYP4F2	2
BP	GO:2001135	regulation of endocytic recycling	2/68	12/18866	0.000825393	0.0389011	0.0342623	PLA2G4E/PLA2G3	2
BP	GO:0033559	unsaturated fatty acid metabolic process	4/68	118/18866	0.000869863	0.0392888	0.0346038	CYP4F3/PLA2G3/CYP4F2/AKR1C1	4
BP	GO:0120254	olefinic compound metabolic process	4/68	121/18866	0.000955238	0.0395444	0.0348289	CYP4F3/CYP4F2/DHRS9/AKR1C1	4
BP	GO:0051438	regulation of ubiquitin-protein transferase activity	3/68	54/18866	0.000973986	0.0395444	0.0348289	MAGEC2/MAGEA2/MAGEA2B	3
BP	GO:0006690	icosanoid metabolic process	4/68	122/18866	0.000984962	0.0395444	0.0348289	CYP4F3/PLA2G3/CYP4F2/AKR1C1	4
BP	GO:0009111	vitamin catabolic process	2/68	14/18866	0.00113275	0.0423415	0.0372925	CYP4F3/CYP4F2	2
BP	GO:1901569	fatty acid derivative catabolic process	2/68	14/18866	0.00113275	0.0423415	0.0372925	CYP4F3/CYP4F2	2
BP	GO:0042445	hormone metabolic process	5/68	221/18866	0.00120686	0.0436078	0.0384078	AKR1B15/AKR1B10/RDH12/DHRS9/AKR1C1	5
CC	GO:0001533	cornified envelope	3/67	45/19559	0.000491847	0.0414356	0.0355226	SPRR2G/RPTN/CDSN	3
CC	GO:0043679	axon terminus	4/67	130/19559	0.00103319	0.0414356	0.0355226	PNOC/CALB1/NTS/NTRK2	4
CC	GO:0042599	lamellar body	2/67	17/19559	0.00152076	0.0414356	0.0355226	KRTDAP/ABCA12	2
CC	GO:0044306	neuron projection terminus	4/67	149/19559	0.00170868	0.0414356	0.0355226	PNOC/CALB1/NTS/NTRK2	4
MF	GO:0008106	alcohol dehydrogenase (NADP+) activity	4/71	21/18352	1.17e-06	0.000179181	0.00013437	AKR1B15/AKR1B10/RDH12/AKR1C1	4
MF	GO:0004033	aldo-keto reductase (NADP) activity	4/71	27/18352	3.37e-06	0.000258145	0.000193586	AKR1B15/AKR1B10/RDH12/AKR1C1	4
MF	GO:0004032	alditol:NADP+ 1-oxidoreductase activity	3/71	12/18352	1.19e-05	0.000455415	0.000341522	AKR1B15/AKR1B10/AKR1C1	3
MF	GO:0052650	NADP-retinol dehydrogenase activity	3/71	12/18352	1.19e-05	0.000455415	0.000341522	AKR1B15/AKR1B10/RDH12	3
MF	GO:0016616	oxidoreductase activity, acting on the CH-OH group of donors, NAD or NADP as acceptor	5/71	120/18352	0.000101413	0.00310325	0.00232717	AKR1B15/AKR1B10/RDH12/DHRS9/AKR1C1	5
MF	GO:0016614	oxidoreductase activity, acting on CH-OH group of donors	5/71	130/18352	0.000147838	0.00376988	0.00282709	AKR1B15/AKR1B10/RDH12/DHRS9/AKR1C1	5
MF	GO:0033764	steroid dehydrogenase activity, acting on the CH-OH group of donors, NAD or NADP as acceptor	3/71	30/18352	0.000209014	0.00456846	0.00342595	AKR1B15/DHRS9/AKR1C1	3
MF	GO:0016229	steroid dehydrogenase activity	3/71	34/18352	0.000304668	0.00582677	0.00436958	AKR1B15/DHRS9/AKR1C1	3
MF	GO:0016709	oxidoreductase activity, acting on paired donors, with incorporation or reduction of molecular oxygen, NAD(P)H as one donor, and incorporation of one atom of oxygen	3/71	45/18352	0.000700794	0.0119135	0.0089341	CYP4F3/CYP4F2/AKR1C1	3
MF	GO:0089720	caspase binding	2/71	12/18352	0.000949883	0.0145332	0.0108987	CARD18/MAGEA3	2
MF	GO:0047498	calcium-dependent phospholipase A2 activity	2/71	16/18352	0.00170986	0.0237826	0.0178349	PLA2G4E/PLA2G3	2
MF	GO:0046906	tetrapyrrole binding	4/71	148/18352	0.00259609	0.0276208	0.0207132	CYP4F3/CYP4F2/HBG2/TCN1	4
MF	GO:0004745	retinol dehydrogenase activity	2/71	20/18352	0.00268035	0.0276208	0.0207132	RDH12/DHRS9	2
MF	GO:0008391	arachidonic acid monooxygenase activity	2/71	20/18352	0.00268035	0.0276208	0.0207132	CYP4F3/CYP4F2	2
MF	GO:0048018	receptor ligand activity	7/71	487/18352	0.00272916	0.0276208	0.0207132	DKK1/PNOC/IFNE/NTS/DEFB103B/DEFB103A/IL36G	7
MF	GO:0030546	signaling receptor activator activity	7/71	492/18352	0.00288845	0.0276208	0.0207132	DKK1/PNOC/IFNE/NTS/DEFB103B/DEFB103A/IL36G	7
MF	GO:0070330	aromatase activity	2/71	25/18352	0.00417964	0.036371	0.0272752	CYP4F3/CYP4F2	2
MF	GO:0102567	phospholipase A2 activity (consuming 1,2-dipalmitoylphosphatidylcholine)	2/71	26/18352	0.00451667	0.036371	0.0272752	PLA2G4E/PLA2G3	2
MF	GO:0102568	phospholipase A2 activity consuming 1,2-dioleoylphosphatidylethanolamine)	2/71	26/18352	0.00451667	0.036371	0.0272752	PLA2G4E/PLA2G3	2
MF	GO:0005184	neuropeptide hormone activity	2/71	30/18352	0.00598542	0.0457884	0.0343374	PNOC/NTS	2
KEGG	hsa00590	Arachidonic acid metabolism	4/26	61/8114	3.82e-05	0.00271172	0.00241221	4051/123745/50487/8529	4
